# Supplementary material for: On the electrostatic component of protein-protein binding free energy
Source: Springer Nature journal article supplement (doi:10.1186/1757-5036-1-2), 2008-11-05
Supplement: Additional file 1 [file 1757-5036-1-2-s1.doc]

**Additional file 1**

This section provides the correlation plots of Gel calculated with different force fields.

**Fig. 1S**. Gel calculated with Charmm27 force field parameters versus Gel calculated with Amber98. The internal dielectric constant is 2.0 and the molecule surface is determined with probe radius 1.4 A. Non-minimized hetero-complexes.

**Fig. 2S**. Gel calculated with Charmm27 force field parameters versus Gel calculated with Amber98. The internal dielectric constant is 2.0 and the molecule surface is determined with probe radius 0.0 A. Non-minimized hetero-complexes.

**Fig. 3S**. Gel calculated with OPLS force field parameters versus Gel calculated with Amber98. The internal dielectric constant is 2.0 and the molecule surface is determined with probe radius 1.4 A. Non-minimized hetero-complexes.

**Fig. 4S**. Gel calculated with OPLS force field parameters versus Gel calculated with Amber98. The internal dielectric constant is 2.0 and the molecule surface is determined with probe radius 0.0 A. Non-minimized hetero-complexes.

**Fig. 5S**. Gel calculated with OPLS force field parameters versus Gel calculated with Charmm27. The internal dielectric constant is 2.0 and the molecule surface is determined with probe radius 1.4 A. Non-minimized hetero-complexes.

**Fig. 6S**. Gel calculated with OPLS force field parameters versus Gel calculated with Charmm27. The internal dielectric constant is 2.0 and the molecule surface is determined with probe radius 0.0 A. Non-minimized hetero-complexes.

**Fig. 7S**. Gel calculated with Charmm27 force field parameters versus Gel calculated with Amber98. The internal dielectric constant is 2.0 and the molecule surface is determined with probe radius 1.4 A. Non-minimized homo-complexes.

**Fig. 8S**. Gel calculated with Charmm27 force field parameters versus Gel calculated with Amber98. The internal dielectric constant is 2.0 and the molecule surface is determined with probe radius 0.0 A. Non-minimized homo-complexes.

**Fig. 9S**. Gel calculated with OPLS force field parameters versus Gel calculated with Amber98. The internal dielectric constant is 2.0 and the molecule surface is determined with probe radius 1.4 A. Non-minimized homo-complexes.

**Fig. 10S.** Gel calculated with OPLS force field parameters versus Gel calculated with Amber98. The internal dielectric constant is 2.0 and the molecule surface is determined with probe radius 0.0 A. Non-minimized homo-complexes.

**Fig. 11S**. Gel calculated with OPLS force field parameters versus Gel calculated with Charmm27. The internal dielectric constant is 2.0 and the molecule surface is determined with probe radius 1.4 A. Non-minimized homo-complexes.

**Fig. 12S**. Gel calculated with OPLS force field parameters versus Gel calculated with Charmm27. The internal dielectric constant is 2.0 and the molecule surface is determined with probe radius 0.0 A. Non-minimized homo-complexes.
